# Supplementary material for: The Interplay between Perioperative Oxidative Stress and Hepatic Dysfunction after Human Liver Resection: A Prospective Observational Pilot Study
Source: MDPI journal article supplement (doi:10.3390/antiox13050590), 2024-05-11

## Supplementary data

### The interplay between perioperative oxidative stress and hepatic dysfunction after human liver resection: a prospective observational pilot study

Primavesi F et al., *Antioxidants*, 2024

#### A) Comparison of colorectal cancer liver metastases, cholangiocarcinoma and hepatocellular carcinoma patients (n=37)

|                                          | CRLM (n=15)       | CCC (n=11)          | HCC (n=11)         | P *   |
|------------------------------------------|-------------------|---------------------|--------------------|-------|
| Maximum tumour size (mm)                 | 50 (30; 65)       | 50 (27; 62)         | 80 (40; 100)       | 0.358 |
| Preoperative serum 8-isoprostane (pg/ml) | 54.3 (33.7; 85.6) | 166.6 (46.7; 229.2) | 79.2 (34.7; 129.3) | 0.058 |
| Preoperative serum 4-HNE (ng/ml)         | 23.5 (18.5; 45.5) | 54.6 (19.8; 64.6)   | 42.9 (23.2; 56.2)  | 0.264 |
| Pre-resection UCP-2 immunoscore          | 145(70;165)       | 160 (98.75; 180)    | 132.5 (85; 175)    | 0.463 |
| Pre-resection 4-HNE immunoscore          | 80 (67.5; 127.5)  | 85 (65; 167.5)      | 72.5 (70; 120)     | 0.752 |

All values are median with IQR; \* = p-values calculated with Kruskal-Wallis test;  
4-HNE = 4-hydroxynonenal; CCC = cholangiocarcinoma; CRLM = colorectal liver metastases; HCC = hepatocellular carcinoma; UCP-2 = uncoupling protein 2.

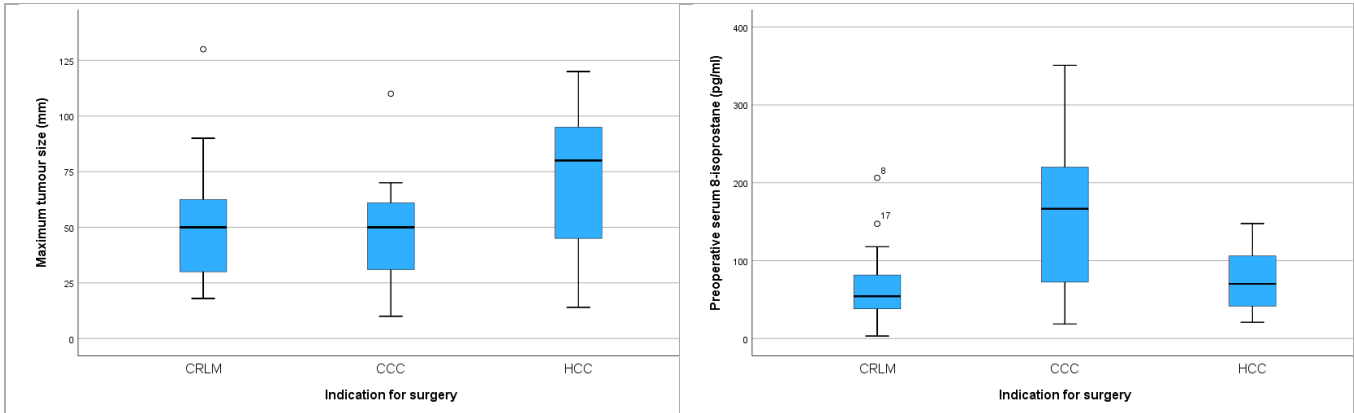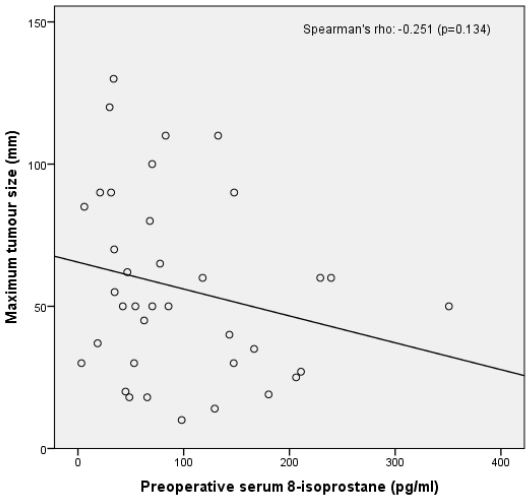

## B) Subgroup analysis of cholangiocarcinoma patients only (n=11)

|                                          | T1 (n=6)            | T2 (n=5)           | P*    |
|------------------------------------------|---------------------|--------------------|-------|
| Preoperative serum 8-isoprostane (pg/ml) | 149.6 (39.7; 195.1) | 210.9 (66.2; 290)  | 0.465 |
| Preoperative serum 4-HNE (ng/ml)         | 29.5 (17.2; 46.9)   | 64.6 (57.9; 66.4)  | 0.013 |
| Pre-resection UCP-2 immunoscore          | 132.5 (90.6; 176.3) | 170 (112.5; 180)   | 0.539 |
| Pre-resection 4-HNE immunoscore          | 71.3 (65; 154.4)    | 85 (73.8; 170)     | 0.459 |
|                                          | N- (n=8)            | N+ (n=3)           | P*    |
| Preoperative serum 8-isoprostane (pg/ml) | 115.3 (37.4; 224.6) | 210.9 (166.6; n/c) | 0.307 |
| Preoperative serum 4-HNE (ng/ml)         | 40.6 (17.9; 63.8)   | 61.2 (54.6; n/c)   | 0.183 |
| Pre-resection UCP-2 immunoscore          | 150 (82.5; 175)     | 172.5 (160; n/c)   | 0.303 |
| Pre-resection 4-HNE immunoscore          | 77.5 (65; 180)      | 120 (85; n/c)      | 0.460 |

All values are median with IQR; \* = p-values calculated with Mann-Whitney-U test;  
4-HNE = 4-hydroxynonenal; n/c = not computable; UCP-2 = uncoupling protein 2.

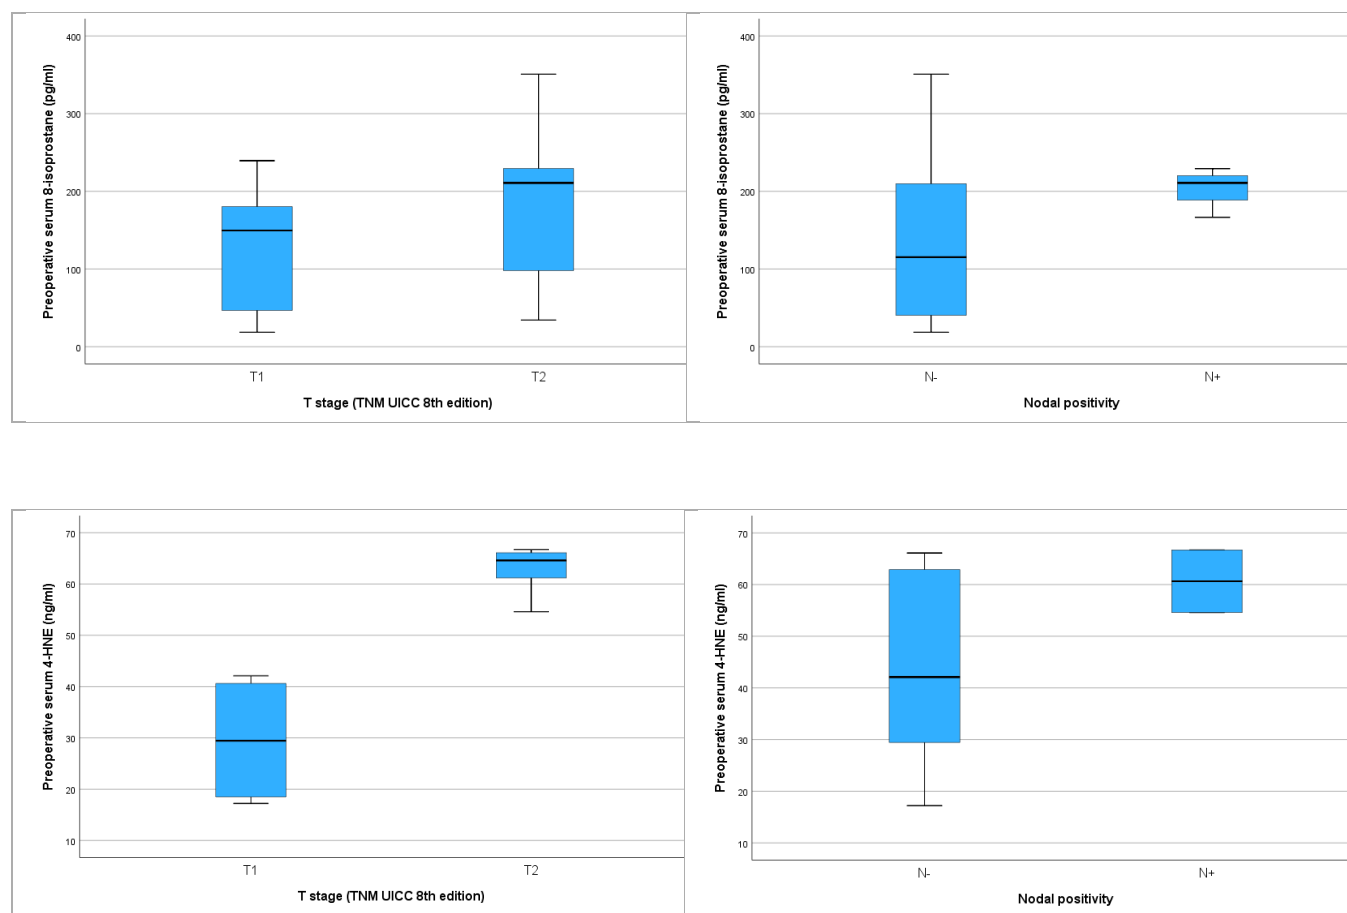

### C) Subgroup analysis of hepatocellular carcinoma patients only (n=11)

|                                          | T1 (n=5)           | T2 (n=2)         | T3 (n=2)          | T4 (n=2)         | P*    |
|------------------------------------------|--------------------|------------------|-------------------|------------------|-------|
| Preoperative serum 8-isoprostane (pg/ml) | 82.9 (52.5; 145.5) | 59.5 (48.6; n/c) | 25.4 (20.9; n/c)  | 98.7 (68; n/c)   | 0.167 |
| Preoperative serum 4-HNE (ng/ml)         | 42.9 (26.8; 49.7)  | 37.5 (31.6; n/c) | 51.6 (14.5; n/c)  | 63.5 (15.7; n/c) | 0.985 |
| Pre-resection UCP-2 immunoscore          | 150 (110; 180)     | 120 (85; n/c)    | 133.8 (57.5; n/c) | 83.8 (82.5; n/c) | 0.418 |
| Pre-resection 4-HNE immunoscore          | 120 (72.5; 142.5)  | 72.5 (70; n/c)   | 73.8 (67.5; n/c)  | 67.5 (62.5; n/c) | 0.274 |

All values are median with IQR; \* = p-values calculated with Kruskal-Wallis test;

4-HNE = 4-hydroxynonenal; n/c = not computable; UCP-2 = uncoupling protein 2.

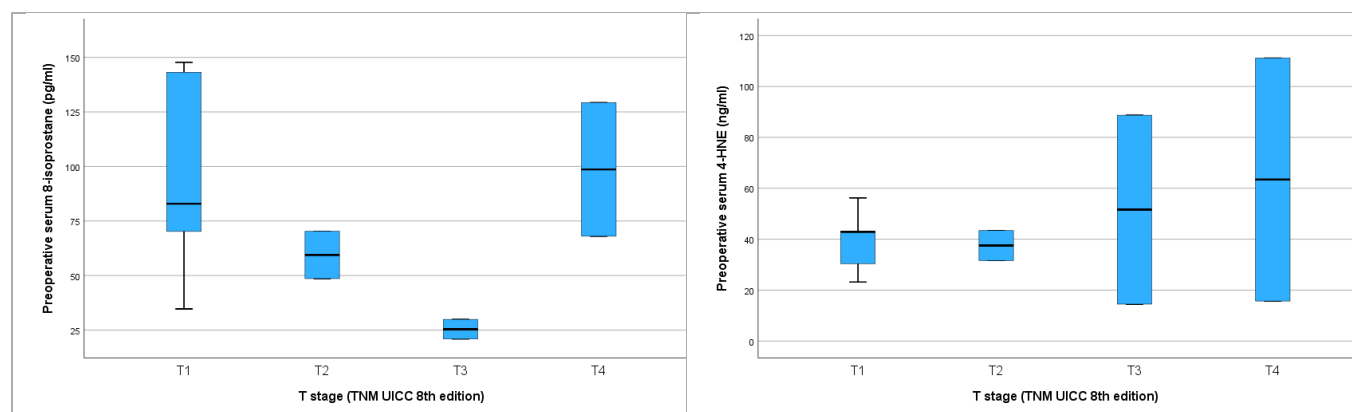

Supplement: s1 [file s1]
